# Supplementary material for: Meta-analysis of the prognostic value of circulating tumor cells detected with the CellSearch System in colorectal cancer
Source: PubMed Central journal article supplement (PMC4389311; doi:10.1186/s12885-015-1218-9), 2015-03-30
Supplement: 12885_2015_1218_MOESM1_ESM.pdf [file 12885_2015_1218_MOESM1_ESM.pdf]

# Search Process (up to December, 2014)

## 1. Databases, results and search strategies

### **PubMed: 60 studies**

Search strategies: (circulating tumor cells OR micrometastasis OR disseminated tumor cells OR isolated tumor cells OR occult tumor cells) AND CellSearch AND (colorectal cancer OR rectal cancer OR colon cancer)

### **Embase: 106 studies**

Search strategies: (circulating tumor cells OR micrometastasis OR disseminated tumor cells OR isolated tumor cells OR occult tumor cells).af. AND (CellSearch).af. AND (colorectal cancer OR rectal cancer OR colon cancer).af.

### **Web of Science: 110 studies**

Search strategies: (TS=circulating tumor cells OR TS=micrometastasis OR TS=disseminated tumor cells OR TS=isolated tumor cells OR TS=occult tumor cells) AND TS=CellSearch AND (TS=colorectal cancer OR TS=rectal cancer OR TS=colon cancer)

### **Cochrane Library: 3 studies**

Search strategies: (circulating tumor cells OR micrometastasis OR disseminated tumor cells OR isolated tumor cells OR occult tumor cells) AND CellSearch AND (colorectal cancer OR rectal cancer OR colon cancer)

### **Manual search for reference lists: 13 studies**

## 2. Excluded Studies by screening title and abstract

### (1): 40 studies with other cancer:

1. Zovato S, Opocher G, Rossi E, Indraccolo S, Amadori A, Pastorelli D, Lombardi G, Anglani M, Zamarchi R: **Predictive value and biologic significance of circulating tumor cells (CTC) in sporadic and von hippel lindau (VHL) renal cancer.** In., vol. 7, 2-3 edn: Elsevier Ltd; 2009: 436-437.
2. Yang JD, Campion MB, Chaiteerakij R, Mettler TA, Giama NH, Zhang X, Hu C, Rud J, Halling KC, Roberts LR: **Circulating tumor cells are associated with more advanced disease in cholangiocarcinoma.** In., vol. 144, 5 SUPPL. 1 edn: W.B. Saunders; 2013: S957.
3. Yang JD, Campion MB, Chaiteerakij R, Mettler TA, Giama NH, Campion VL, Halling KC, Roberts LR: **Circulating tumor cells in cholangiocarcinoma.** In., vol. 140, 5 SUPPL. 1 edn: W.B. Saunders; 2011: S921.
4. Wu W, Woo J, Melnikova VO, Pace M, Gupta V, Jouravleva E, Anderes KL, Ackermann EJ, Kwoh TJ, Davis DW: **Expression of eIF4E relevant biomarkers detected in circulating tumor cells from metastatic NSCLC and prostate cancer patients using antibody-independent ApoStream technology.** In., vol. 30, 15 SUPPL. 1 edn: American Society of Clinical Oncology; 2012.
5. Van der Auwera I, Elst HJ, Van Laere SJ, Maes H, Huget P, van Dam P, Van Marck EA, Vermeulen PB, Dirix LY: **The presence of circulating total DNA and methylated genes is associated with circulating tumour cells in blood from breast cancer patients.** *British journal of cancer* 2009, **100**(8):1277-1286.
6. Tanaka F, Yoneda K, Kondo N, Hashimoto M, Takuwa T, Matsumoto S, Okumura Y, Rahman S, Tsubota N, Tsujimura T *et al*: **Circulating Tumor Cell as a Diagnostic Marker in Primary Lung Cancer.** *Clinical Cancer Research* 2009, **15**(22):6980-6986.
7. Smerage JB, Budd GT, Doyle GV, Brown M, Paoletti C, Muniz M, Miller MC, Repollet MI, Chianese DA, Connelly MC *et al*: **Monitoring apoptosis and Bcl-2 on circulating tumor cells in patients with metastatic breast cancer.** *Molecular oncology* 2013, **7**(3):680-692.
8. Sieuwerts AM, Kraan J, Bolt-De Vries J, Van Der Spoel P, Elstrodt F, Smid M, Timmermans M, Mostert B, Schutte M, Martens JWM *et al*: **Response: Re: Anti-Epithelial Cell Adhesion Molecule Antibodies and the Detection of Circulating Normal-Like Breast Tumor Cells.** *Journal of the National Cancer Institute* 2009, **101**(12):896-897.
9. Sclafani F, Smyth E, Cunningham D, Chau I, Turner A, Watkins D: **A pilot study assessing the incidence and clinical significance of circulating tumor**

- cells in esophagogastric cancers. *Clinical colorectal cancer* 2014, **13**(2):94-99.
10. Schneck H, Blassl C, Meier-Stiegen F, Neves RP, Janni W, Fehm T, Neubauer H: **Analysing the mutational status of PIK3CA in circulating tumor cells from metastatic breast cancer patients.** *Molecular oncology* 2013, **7**(5):976-986.
  11. Scher HI, Morris MJ, Basch E, Heller G: **End Points and Outcomes in Castration-Resistant Prostate Cancer: From Clinical Trials to Clinical Practice.** *Journal Of Clinical Oncology* 2011, **29**(27):3695-3704.
  12. Samoila A, Wan M, Anand A, Chuang T, Scher HI, Fleisher M, Danila DC: **A pilot study comparing the sensitivity of detecting prostate associated transcripts by AdnaTest prostate assay to CellSearch in whole blood from patients with castration resistant prostate cancer.** In., vol. 14, 6 edn: Elsevier; 2012: 709.
  13. Poveda A, Kaye SB, McCormack R, Wang S, Parekh T, Ricci D, Lebedinsky CA, Tercero JC, Zintl P, Monk BJ: **Circulating tumor cells predict progression free survival and overall survival in patients with relapsed/recurrent advanced ovarian cancer.** *Gynecologic oncology* 2011, **122**(3):567-572.
  14. Park Y, Kitahara T, Urita T, Yoshida Y, Kato R: **Expected clinical applications of circulating tumor cells in breast cancer.** *World journal of clinical oncology* 2011, **2**(8):303-310.
  15. Park S, Ang RR, Duffy SP, Bazov J, Chi KN, Black PC, Ma H: **Morphological Differences between Circulating Tumor Cells from Prostate Cancer Patients and Cultured Prostate Cancer Cells.** *PloS one* 2014, **9**(1).
  16. Okumura Y, Tanaka F, Yoneda K, Hashimoto M, Takuwa T, Kondo N, Hasegawa S: **Circulating Tumor Cells in Pulmonary Venous Blood of Primary Lung Cancer Patients.** *Annals Of Thoracic Surgery* 2009, **87**(6):1669-1675.
  17. O'Flaherty JD, Gray S, Richard D, Fennell D, O'Leary JJ, Blackhall FH, O'Byrne KJ: **Circulating tumour cells, their role in metastasis and their clinical utility in lung cancer.** *Lung cancer* 2012, **76**(1):19-25.
  18. Negin BP, Meropol NJ, Alpaugh RK, Ruth K, McAleer C, Halbherr T, Bingham C, Fittipaldi P, Cohen SJ: **Characterization and prognostic significance of circulating tumor cells in the peripheral blood of patients with metastatic pancreatic cancer.** In., vol. 28, 15 SUPPL. 1 edn: American Society of Clinical Oncology; 2010.
  19. Naito T, Tanaka F, Ono A, Yoneda K, Takahashi T, Murakami H, Nakamura Y, Tsuya A, Kenmotsu H, Shukuya T *et al*: **Prognostic Impact of Circulating Tumor Cells in Patients with Small Cell Lung Cancer.** *Journal Of Thoracic Oncology* 2012, **7**(3):512-519.
  20. Murez T, Droupy S, Rebillard X, Alix-Panabieres C: **[Circulating tumor cells and advanced prostate cancer].** *Bulletin du cancer* 2012, **99** Suppl 1:S4-15.

21. Mueller V, Riethdorf S, Rack B, Janni W, Fasching PA, Solomayer E, Aktas B, Kasimir-Bauer S, Zeitz J, Pantel K *et al*: **Prospective evaluation of serum tissue inhibitor of metalloproteinase 1 and carbonic anhydrase IX in correlation to circulating tumor cells in patients with metastatic breast cancer.** *Breast Cancer Research* 2011, **13**(4).
22. Melnikova VO, Davis DW, Mittelman D, Zhang Y, Holz GS, Doshi GK, Cen P, Amato RJ: **Development of a new, sensitive assay for circulating tumor cell detection in prostate cancer.** In., vol. 28, 15 SUPPL. 1 edn: American Society of Clinical Oncology; 2010.
23. Lorente D, Mateo J, de Bono JS: **Molecular characterization and clinical utility of circulating tumor cells in the treatment of prostate cancer.** *American Society of Clinical Oncology educational book / ASCO American Society of Clinical Oncology Meeting* 2014:e197-203.
24. Loh J, Jovanovic L, Lehman M, Capp A, Pryor D, Harris M, Nelson C, Martin J: **Circulating tumor cell detection in high-risk non-metastatic prostate cancer.** *Journal of cancer research and clinical oncology* 2014, **140**(12):2157-2162.
25. Le Rhun E, Massin F, Tu Q, Bonnetterre J, Bittencourt Mde C, Faure GC: **Development of a new method for identification and quantification in cerebrospinal fluid of malignant cells from breast carcinoma leptomeningeal metastasis.** *BMC clinical pathology* 2012, **12**:21.
26. Krebs MG, Hou J-M, Sloane R, Lancashire L, Priest L, Nonaka D, Ward TH, Backen A, Clack G, Hughes A *et al*: **Analysis of Circulating Tumor Cells in Patients with Non-small Cell Lung Cancer Using Epithelial Marker-Dependent and -Independent Approaches.** *Journal Of Thoracic Oncology* 2012, **7**(2):306-315.
27. Kindelberger DW, Matulonis U: **The utility of circulating tumor cells in monitoring patients with recurrent ovarian cancer.** In., vol. 90: Nature Publishing Group; 2010: 250A.
28. Kaifi JT, Kunkel M, Allen JE, Dicker DT, Das A, Gusani NJ, Reed MF, Kimchi ET, Staveley-O'Carroll KF, El-Deiry WS: **Presence of circulating tumor cells in patients with resectable colorectal cancer lung metastases is a potential indicator for extrathoracic disease.** In., vol. 179, 2 edn: Academic Press Inc.; 2013.
29. Hosokawa M, Kenmotsu H, Koh Y, Yoshino T, Yoshikawa T, Naito T, Takahashi T, Murakami H, Nakamura Y, Tsuya A *et al*: **Size-based isolation of circulating tumor cells in lung cancer patients using a microcavity array system.** *PloS one* 2013, **8**(6):e67466.
30. Hashimoto M, Tanaka F, Yoneda K, Takuwa T, Matsumoto S, Okumura Y, Kondo N, Hasegawa S, Tsujimura T, Nakano T: **Circulating tumor cells (CTCs) in patients who underwent lung resection for lung metastases.** In., vol. 9: European Association for Cardio-Thoracic Surgery; 2009: S29-S30.
31. Gurtowska N, Bajek A, Olkowska J, Drewa T: **Identification of circulating tumor cells as a promising method of genitourinary cancer diagnosis.**

- Postepy higieny i medycyny doswiadczonej* 2012, **66**:983-990.
32. Gazzaniga P, Gradilone A, De Berardinis E, Nicolazzo C, Petracca A, Farcomeni A, Busetto GM, Gentile V, Frati L, Cortesi E: **Prognostic value of circulating tumor cells in non muscle invasive bladder cancer: A CellSearch analysis.** *European Urology Supplements* 2012, **11**(1):E900-U893.
  33. Fornvik D, Andersson I, Dustler M, Ehrnstrom R, Ryden L, Tingberg A, Zackrisson S, Aaltonen K: **No evidence for shedding of circulating tumor cells to the peripheral venous blood as a result of mammographic breast compression.** *Breast cancer research and treatment* 2013, **141**(2):187-195.
  34. Connelly M, Wang Y, Doyle GV, Terstappen L, McCormack R: **Re: Anti-Epithelial Cell Adhesion Molecule Antibodies and the Detection of Circulating Normal-Like Breast Tumor Cells.** *Journal of the National Cancer Institute* 2009, **101**(12):895-895.
  35. Blonski M, Wittwer B, Faure G, Simon L, De Carvalho Bittencourt M, Tu Q, Larrieu D, Le Rhun E, Taillandier L: **Identification and quantification of CSF malignant T-cells by the CellSearch technology in patients with lung leptomeningeal metastasis.** In., vol. 21: Blackwell Publishing Ltd; 2014: 45.
  36. Blonski M, Wittwer B, Faure G, Simon L, De Carvalho Bittencourt M, Tu Q, Larrieu D, Le Rhun E, Taillandier L: **Identification and quantification of CSF malignant cells by the CellSearch technology in patients with lung leptomeningeal metastasis.** In., vol. 261: D. Steinkopff-Verlag; 2014: S34.
  37. Bidard FC, Mathiot C, Degeorges A, Etienne-Grimaldi MC, Delva R, Pivot X, Veyret C, Bergougnoux L, de Cremoux P, Milano G *et al*: **Clinical value of circulating endothelial cells and circulating tumor cells in metastatic breast cancer patients treated first line with bevacizumab and chemotherapy.** *Annals Of Oncology* 2010, **21**(9):1765-1771.
  38. Alemar J, Schuur ER: **Progress in using circulating tumor cell information to improve metastatic breast cancer therapy.** In. United States: Hindawi Publishing Corporation (410 Park Avenue, 15th Floor, 287 pmb, New York NY 10022, United States); 2013.
  39. Gross S, Foulk B, Patel J, Connelly M, Mata M: **Automated enumeration and characterization of circulating multiple myeloma cells in blood.** In., vol. 118, 21 edn: American Society of Hematology; 2011.
  40. Truini A, Alama A, Dal Bello MG, Coco S, Vanni I, Rijavec E, Genova C, Barletta G, Biello F, Grossi F: **Clinical Applications of Circulating Tumor Cells in Lung Cancer Patients by CellSearch System.** *Frontiers in oncology* 2014, **4**:242.

## **(2): 71 studies not relevant**

1. Zhou L, Yang Z, Baker M, Dicker DT, El-Deiry WS: **Multispectral imaging of mismatch repair proteins in colorectal cancers and tumor cells isolated from blood.** In., vol. 72, 8 SUPPL. 1 edn: American Association for Cancer

- Research Inc.; 2012.
2. Zhe X, Cher ML, Bonfil RD: **Circulating tumor cells: Finding the needle in the haystack.** In., vol. 1, 6 edn. United States: E-Century Publishing Corporation (40 White Oaks Lane, Madison WI 53711, United States); 2011: 740-751.
  3. Watanabe M, Uehara Y, Yamashita N, Fujimura Y, Nishio K, Suzuki J, Koizumi F, Koh Y: **Evaluation of a novel flow cytometry-based system for the detection of circulating tumor cells.** In., vol. 72, 8 SUPPL. 1 edn: American Association for Cancer Research Inc.; 2012.
  4. Watanabe M, Uehara Y, Yamashita N, Fujimura Y, Nishio K, Sawada T, Takeda K, Koizumi F, Koh Y: **Multicolor detection of rare tumor cells in blood using a novel flow cytometry-based system.** *Cytometry Part A : the journal of the International Society for Analytical Cytology* 2014, **85**(3):206-213.
  5. Watanabe M, Serizawa M, Sawada T, Takeda K, Takahashi T, Yamamoto N, Koizumi F, Koh Y: **A novel flow cytometry-based cell capture platform for the detection, capture and molecular characterization of rare tumor cells in blood.** *Journal of translational medicine* 2014, **12**.
  6. Wang LH, Pfister TD, Parchment RE, Kummer S, Rubinstein L, Evrard YA, Gutierrez ME, Murgo AJ, Tomaszewski JE, Doroshow JH *et al*: **Monitoring drug-induced H2AX as a pharmacodynamic biomarker in individual circulating tumor cells.** In., vol. 16, 3 edn. United States: American Association for Cancer Research Inc. (615 Chestnut Street, 17th Floor, Philadelphia PA 19106-3483, United States); 2010: 1073-1084.
  7. Sun YF, Yang XR, Zhou J, Qiu SJ, Fan J, Xu Y: **Circulating tumor cells: Advances in detection methods, biological issues, and clinical relevance.** In., vol. 137, 8 edn. Germany: Springer Verlag (Tiergartenstrasse 17, Heidelberg D-69121, Germany); 2011: 1151-1173.
  8. Sua Villegas LF, Silva Perez NM, Vidaurreta Lazaro M, Maestro de las Casas ML, Rafael Fernandez S, Vezanzones de Castro S: **Current and future techniques for quantifying circulating tumor cells: Importance in solid epithelial tumors.** In., vol. 4, 3 edn. Spain: Ediciones Doyma, S.L. (Travesera de Gracia 17-21, Barcelona 08021, Spain); 2011: 163-169.
  9. Shahneh FZ: **Sensitive antibody-based CTCs detection from peripheral blood.** In., vol. 22, 1-2 edn. Netherlands: IOS Press (Nieuwe Hemweg 6B, Amsterdam 1013 BG, Netherlands); 2013: 51-54.
  10. Seronie-Vivien S: **[Circulating tumor cells: a new challenge for laboratory medicine].** *Annales de biologie clinique* 2014, **72**(2):153-177.
  11. Scholtens TM, Schreuder F, Ligthart ST, Swennenhuis JF, Greve J, Terstappen LWMM: **Automated identification of circulating tumor cells by image cytometry.** *Cytometry Part A* 2012, **81A**(2):138-148.
  12. Rossi E, Basso U, Celadin R, Zilio F, Pucciarelli S, Aieta M, Barile C, Sava T, Bonciarelli G, Tumolo S *et al*: **M30 neoepitope expression in epithelial cancer: Quantification of apoptosis in circulating tumor cells by**

- CellSearch analysis.** In., vol. 16, 21 edn. United States: American Association for Cancer Research Inc. (615 Chestnut Street, 17th Floor, Philadelphia PA 19106-3483, United States); 2010: 5233-5243.
13. Raimondi C, Gradilone A, Naso G, Cortesi N, Gazzaniga P: **Clinical utility of circulating tumor cell counting through CellSearch (R): the dilemma of a concept suspended in Limbo.** *OncoTargets and therapy* 2014, **7**:619-625.
  14. Peters KL, Allen JE, Dicker DT, Das A, Joudeh J, El-Deiry WS: **CTC profiling: Integration of biomarker analysis with current Veridex CellSearch technology.** In., vol. 71, 8 SUPPL. 1 edn: American Association for Cancer Research Inc.; 2011.
  15. Peeters DJE, De Laere B, Van den Eynden GG, Van Laere SJ, Rothe F, Ignatiadis M, Sieuwerts AM, Lambrechts D, Rutten A, van Dam PA *et al*: **Semiautomated isolation and molecular characterisation of single or highly purified tumour cells from CellSearch enriched blood samples using dielectrophoretic cell sorting.** *British journal of cancer* 2013, **108**(6):1358-1367.
  16. Paterlini-Brechot P, Benali NL: **Circulating tumor cells (CTC) detection: Clinical impact and future directions.** In., vol. 253, 2 edn. Ireland: Elsevier Ireland Ltd; 2007: 180-204.
  17. Parkinson DR, Dracopoli N, Petty BG, Compton C, Cristofanilli M, Deisseroth A, Hayes DF, Kapke G, Kumar P, Lee JSH *et al*: **Considerations in the development of circulating tumor cell technology for clinical use.** *Journal of translational medicine* 2012, **10**.
  18. Pantel K, Deneve E, Nocca D, Coffy A, Vendrell JP, Maudelonde T, Riethdorf S, Alix-Panabieres C: **Circulating epithelial cells in patients with benign colon diseases.** *Clinical chemistry* 2012, **58**(5):936-940.
  19. Pace M, Melnikova VO, Brandl K, Kahn L, Woo J, Davis DW: **BRAFV600E mutation analysis in circulating tumor cells.** In., vol. 71, 8 SUPPL. 1 edn: American Association for Cancer Research Inc.; 2011.
  20. Ozkumur E, Shah AM, Ciciliano JC, Emmink BL, Miyamoto DT, Brachtel E, Yu M, Chen PI, Morgan B, Trautwein J *et al*: **Inertial focusing for tumor antigen-dependent and -independent sorting of rare circulating tumor cells.** In., vol. 5, 179 edn. United States: American Association for the Advancement of Science (1200 New York Avenue NW, Washington DC 20005, United States); 2013.
  21. Negin BP, Cohen SJ: **Circulating tumor cells in colorectal cancer: Past, present, and future challenges.** In., vol. 11, 1-2 edn. United States: Springer New York (233 Springer Street, New York NY 10013-1578, United States); 2010: 1-13.
  22. Mikulova V, Kolostova K, Zima T: **Methods for Detection of Circulating Tumour Cells and Their Clinical Value in Cancer Patients.** *Folia Biologica* 2011, **57**(4):151-161.
  23. Melnikova VO, Liu W, Zhang Y, Hong DS, Davis DW: **Development of a new, highly sensitive assay for circulating tumor cell (CTC) detection**

- based on the CellSearch (R) CTC Profile Kit enrichment and laser scanning cytometry analysis. *Proceedings of the American Association for Cancer Research Annual Meeting* 2010, **51**:652-653.
24. Mavroudis D: **Circulating cancer cells**. In., vol. 21, SUPPL. 7 edn. United Kingdom: Oxford University Press (Great Clarendon Street, Oxford OX2 6DP, United Kingdom); 2010: vii95-vii100.
  25. Matsusaka S, Kozuka M, Takagi H, Ito H, Minowa S, Hirai M, Hatake K: **A novel detection strategy for living circulating tumor cells using 5-aminolevulinic acid**. In., vol. 355, 1 edn. Ireland: Elsevier Ireland Ltd; 2014: 113-120.
  26. Ma X, Xiao Z, Li X, Wang F, Zhang J, Zhou R, Wang J, Liu L: **Prognostic role of circulating tumor cells and disseminated tumor cells in patients with prostate cancer: a systematic review and meta-analysis**. *Tumor Biology* 2014, **35**(6):5551-5560.
  27. Lowes LE, Hedley BD, Keeney M, Allan AL: **Adaptation of semiautomated circulating tumor cell (CTC) assays for clinical and preclinical research applications**. *Journal of visualized experiments : JoVE* 2014(84):e51248.
  28. Lowes LE, Hedley BD, Keeney M, Allan AL: **User-defined protein marker assay development for characterization of circulating tumor cells using the CellSearch(R) system**. *Cytometry Part A : the journal of the International Society for Analytical Cytology* 2012, **81**(11):983-995.
  29. Lowes LE, Goodale D, Keeney M, Allan AL: **Image Cytometry Analysis of Circulating Tumor Cells**. In: *Recent Advances In Cytometry, Part A: Instrumentation, Methods, Fifth Edition. Volume 102*, edn.; 2011: 261-290.
  30. Lopez-Riquelme N, Minguela A, Villar-Permuy F, Ciprian D, Castillejo A, Alvarez-Lopez M-R, Soto J-L: **Imaging cytometry for counting circulating tumor cells: comparative analysis of the CellSearch vs ImageStream systems**. *Apmis* 2013, **121**(12):1139-1143.
  31. Lianidou ES: **Circulating tumor cells-new challenges ahead**. In., vol. 58, 5 edn. United States: American Association for Clinical Chemistry Inc. (2101 L Street NW, Suite 202, Washington DC 20037-1526, United States); 2012: 805-807.
  32. Le Rhun E, Tu Q, De Carvalho Bittencourt M, Farre I, Mortier L, Cai H, Kohler C, Faure GC: **Detection and quantification of CSF malignant cells by the CellSearch technology in patients with melanoma leptomeningeal metastasis**. *Medical oncology (Northwood, London, England)* 2013, **30**(2):538.
  33. Le Rhun E, Tu Q, Bittencourt MDC, Farre I, Mortier L, Cai H, Kohler C, Faure GC: **Detection and quantification of CSF malignant cells by the CellSearch (R) technology in patients with melanoma leptomeningeal metastasis**. *Medical Oncology* 2013, **30**(2).
  34. Kurbacher CM, Schmidt ME, Arenz PN, Nagel WJ, Stark R, Hanitzsch H, Kurbacher JA: **Circulating Tumour Cells: a Valuable New Tool to Monitor the Clinical Course of Patients With Epithelial Neoplasms in the Routine**



- Setting.** *European journal of cancer* 2011, **47**:S177-S177.
35. Krebs MG, Metcalf RL, Carter L, Brady G, Blackhall FH, Dive C: **Molecular analysis of circulating tumour cells-biology and biomarkers.** *Nature Reviews Clinical Oncology* 2014, **11**(3):129-144.
  36. Komine K, Inoue M, Otsuka K, Fukuda K, Nanjo H, Shibata H: **Utility of Measuring Circulating Tumor Cell Counts to Assess the Efficacy of Treatment for Carcinomas of Unknown Primary Origin.** *Anticancer research* 2014, **34**(6):3165-3168.
  37. King JD, Casavant BP, Lang JM: **Rapid translation of circulating tumor cell biomarkers into clinical practice: technology development, clinical needs and regulatory requirements.** *Lab on a chip* 2014, **14**(1):24-31.
  38. Kasimir-Bauer S: **Circulating tumor cells as markers for cancer risk assessment and treatment monitoring.** In., vol. 13, 4 edn. New Zealand: Adis International Ltd (41 Centorian Drive, Private Bag 65901, Mairangi Bay, Auckland 10 1311, New Zealand); 2009: 209-215.
  39. Joosse SA, Hannemann J, Alix-Panabieres C, Deneve E, Beneken C, Nieuwland M, Kerkhoven RM, Ramos J, Wikman H, Riethdorf L *et al*: **High-resolution genotyping of colorectal cancer in association with the detection of circulating tumor cells.** In., vol. 28, 2 edn: Springer Netherlands; 2011: 211-212.
  40. Hoshino K, Huang Y-Y, Lane N, Huebschman M, Uhr JW, Frenkel EP, Zhang X: **Microchip-based immunomagnetic detection of circulating tumor cells.** *Lab on a chip* 2011, **11**(20):3449-3457.
  41. Herold S, Gasiorowski L, Nowaczyk P, Schumann A, Theil G, Haubold K, Krahn T, Dyszkiewicz W, Murawa D, Lucke K: **An innovative approach for in-vivo isolation of circulating tumor cells (CTCs).** In., vol. 49: Elsevier Ltd; 2013: S199.
  42. Heitzer E, Auer M, Gasch C, Pichler M, Ulz P, Hoffmann EM, Lax S, Waldispuehl-Geigl J, Mauermann O, Lackner C *et al*: **Complex tumor genomes inferred from single circulating tumor cells by array-CGH and next-generation sequencing.** In., vol. 73, 10 edn. United States: American Association for Cancer Research Inc. (615 Chestnut Street, 17th Floor, Philadelphia PA 19106-3483, United States); 2013: 2965-2975.
  43. Hayes DF, Smerage JB: **Circulating tumor cells.** In: *Progress in molecular biology and translational science.* vol. 95, C edn. United States: Academic Press Inc.; 2010: 95-112.
  44. Hayes DF: **Blood biomarkers: A clinical point of view.** In., vol. 22: Oxford University Press; 2011: ii27.
  45. Harris JL, Stocum M, Roberts L, Jiang C, Lin J, Sprott K: **Quest for the ideal cancer biomarker: An update on progress in capture and characterization of circulating tumor cells.** In., vol. 74, 2 edn. United States: Wiley-Liss Inc. (111 River Street, Hoboken NJ 07030-5774, United States); 2013: 138-147.
  46. Harouaka RA, Zhou MD, Yeh YT, Khan WJ, Das A, Liu X, Christ CC, Dicker DT, Baney TS, Kaifi JT *et al*: **Flexible micro spring array device for**

- high-throughput enrichment of viable circulating tumor cells.** In., vol. 60, 2 edn. United States: American Association for Clinical Chemistry Inc. (2101 L Street NW, Suite 202, Washington DC 20037-1526, United States); 2014: 323-333.
47. Harb W, Fan A, Tran T, Danila DC, Keys D, Schwartz M, Ionescu-Zanetti C: **Mutational analysis of circulating tumor cells using a novel microfluidic collection device and qPCR assay.** In., vol. 6, 5 edn. United States: Translational Oncology Editorial Office (109 Zina Pitcher Place, BSRB - A628, Ann Arbor MI 48109-2200, United States); 2013: 528-538.
48. Guo W, Yang X-R, Sun Y-F, Shen M-N, Ma X-L, Wu J, Zhang C-Y, Zhou Y, Xu Y, Hu B *et al*: **Clinical Significance of EpCAM mRNA-Positive Circulating Tumor Cells in Hepatocellular Carcinoma by an Optimized Negative Enrichment and qRT-PCR-Based Platform.** *Clinical Cancer Research* 2014, **20**(18):4794-4805.
49. Grisanti S, Almici C, Consoli F, Buglione M, Verardi R, Bolzoni-Villaret A, Bianchetti A, Ciccacese C, Mangoni M, Ferrari L *et al*: **Circulating Tumor Cells in Patients with Recurrent or Metastatic Head and Neck Carcinoma: Prognostic and Predictive Significance.** *PloS one* 2014, **9**(8).
50. Gorges TM, Pantel K: **Circulating tumor cells as therapy-related biomarkers in cancer patients.** In., vol. 62, 5 edn. Germany: Springer Science and Business Media Deutschland GmbH (Heidelberger Platz 3, Berlin 14197, Germany); 2013: 931-939.
51. Gazzaniga P, Raimondi C, Gradilone A, Naso G, Cortesi E, Frati L: **Circulating tumor cells: Highlight on practical implications.** In., vol. 16, 1 edn. New Zealand: Adis International Ltd (41 Centorian Drive, Private Bag 65901, Mairangi Bay, Auckland 10 1311, New Zealand); 2012: 7-11.
52. Gazzaniga P, Naso G, Gradilone A, Cortesi E, Gandini O, Gianni W, Fabbri MA, Vincenzi B, di Silverio F, Frati L *et al*: **Chemosensitivity profile assay of circulating cancer cells: prognostic and predictive value in epithelial tumors.** *International Journal Of Cancer* 2010, **126**(10):2437-2447.
53. Gates JD, Benavides LC, Stojadinovic A, Mittendorf EA, Holmes JP, Carmichael MG, McCall S, Milford AL, Merrill GA, Ponniah S *et al*: **Monitoring circulating tumor cells in cancer vaccine trials.** In., vol. 4, 5 edn. United States: Landes Bioscience; 2008: 389-392.
54. Garcia-Paredes B, Segura E, Maestro M, Vidaurreta M, Sastre J, Diaz-Rubio E: **Circulating tumor cells: Clinical applicability.** In., vol. 6, 1 edn. Spain: Publicaciones Permanyer (Mallorca 310, Barcelona E-08037, Spain); 2011: 3-11.
55. Gao Y, Yuan Z: **Nanotechnology for the detection and kill of circulating tumor cells.** *Nanoscale Research Letters* 2014, **9**.
56. Gallant JN, Cheng H, Harouaka R, Zheng S, El-Deiry WS: **In vivo drug sensitivity testing of CTCs isolated using the FMSA device.** In., vol. 72, 8 SUPPL. 1 edn: American Association for Cancer Research Inc.; 2012.
57. Friedlander TW, Premasekharan G, Paris PL: **Looking back, to the future of**

- circulating tumor cells.** *Pharmacology & therapeutics* 2014, **142**(3):271-280.
58. Farace F: **Circulating tumor cells: Biologic challenges and clinical relevance.** In. Edited by Vielh P, Solomon D, Cochand-Priollet B, Schmitt F, vol. 57: S. Karger AG; 2013: 17.
  59. Das A, Whitcomb TL, Allen JE, Dicker DT, Peters KL, El-Deiry WS: **Isolation and characterization of circulating tumor cells in a mouse model of colorectal cancer.** In., vol. 72, 8 SUPPL. 1 edn: American Association for Cancer Research Inc.; 2012.
  60. Das A, Allen JE, Dicker DT, Peters KL, Joudeh J, El-Deiry WS: **Quantum dot multiplexing of prognostic marker and stem cell marker expression in colorectal cancer circulating tumor cells.** In., vol. 71, 8 SUPPL. 1 edn: American Association for Cancer Research Inc.; 2011.
  61. Cummings J, Morris K, Zhou C, Sloane R, Lancashire M, Morris D, Bramley S, Krebs M, Khoja L, Dive C: **Method validation of circulating tumour cell enumeration at low cell counts.** *BMC cancer* 2013, **13**.
  62. Coen JJ, Feldman AS, Smith MR, Zietman AL: **Watchful waiting for localized prostate cancer in the PSA era: what have been the triggers for intervention?** *Bju International* 2011, **107**(10):1582-1586.
  63. Chan F, Goodman O, Fink L, Vogelzang NJ, Pomerantz D, Khoury JD: **Dramatically elevated circulating tumor cell numbers in a patient with small cell neuroendocrine carcinoma of the prostate.** *Archives of pathology & laboratory medicine* 2010, **134**(1):120-123.
  64. Chan CML, Au TCC, Chan ATC, Ma BBY, Tsui NBY, Ng SSM, Hui EP, Chan LWC, Ho WS, Yung BYM *et al*: **Advanced technologies for studying circulating tumor cells at the protein level.** In., vol. 10, 6 edn. United Kingdom: Expert Reviews Ltd. (2 Albert Place, London N3 1QB, United Kingdom); 2013: 579-589.
  65. Champion M, Zieman A, Voss J, Zimmerman C, Zhang J, Henry M, Halling K, Clayton A: **Correlation of circulating tumor cell enumeration between cytotechnologists and pathologists using the cellsearch1 assay.** In., vol. 118: John Wiley and Sons Inc.; 2010: 384-385.
  66. Champion M, Zieman A, Voss J, Zimmerman C, Zhang J, Henry M, Halling K, Clayton A: **Correlation of Circulating Tumor Cell Enumeration between Cytotechnologists and Pathologists Using the CellSearch (R) Assay.** *Cancer Cytopathology* 2010, **118**(5):384-385.
  67. Behbakht K, Sill MW, Darcy KM, Rubin SC, Mannel RS, Waggoner S, Schilder RJ, Cai KQ, Godwin AK, Alpaugh RK: **Phase II trial of the mTOR inhibitor, temsirolimus and evaluation of circulating tumor cells and tumor biomarkers in persistent and recurrent epithelial ovarian and primary peritoneal malignancies: A Gynecologic Oncology Group study.** *Gynecologic oncology* 2011, **123**(1):19-26.
  68. Becker TM, Caixeiro NJ, Lim SH, Tognola A, Kienzle N, Scott KF, Spring KJ, de Souza P: **New frontiers in circulating tumor cell analysis: A reference guide for biomolecular profiling toward translational clinical use.**

- International Journal Of Cancer* 2014, **134**(11):2523-2533.
69. Armakolas A, Panteleakou Z, Nezos A, Tsouma A, Skondra M, Lembessis P, Pissimissis N, Koutsilieris M: **Detection of the circulating tumor cells in cancer patients**. In., vol. 6, 12 edn. United Kingdom: Future Medicine Ltd. (2nd Albert Place, Finchley Central, London N3 1QB, United Kingdom); 2010: 1849-1856.
  70. Allard WJ, Matera J, Miller MC, Repollet M, Connelly MC, Rao C, Tibbe AGJ, Uhr JW, Terstappen LWMM: **Tumor cells circulate in the peripheral blood of all major carcinomas but not in healthy subjects or patients with nonmalignant diseases**. In., vol. 10, 20 edn. United States: American Association for Cancer Research Inc.; 2004: 6897-6904.
  71. Alix-Panabieres C: **Detection and characterization of viable circulating tumor cells**. In., vol. 6, 11 SUPPL. 1 edn: American Association for Cancer Research Inc.; 2013.

### 3. Excluded Studies by full-text

#### *(1): 51 not relevant or no sufficient data*

1. Welinder C, Jansson B, Lindell G, Wenner J: **Cytokeratin 20 improves the detection of circulating tumor cells in patients with colorectal cancer**. *Cancer letters* 2014.
2. Steinert G, Scholch S, Niemietz T, Iwata N, Garcia SA, Behrens B, Voigt A, Kloor M, Benner A, Bork U *et al*: **Immune escape and survival mechanisms in circulating tumor cells of colorectal cancer**. In., vol. 74, 6 edn. United States: American Association for Cancer Research Inc.; 2014: 1694-1704.
3. Santos MF, Mannam VKR, Craft BS, Punecky LV, Sheehan NT, Lewis RE, Cruse JM: **Comparative analysis of innate immune system function in metastatic breast, colorectal, and prostate cancer patients with circulating tumor cells**. In., vol. 96, 3 edn. United States: Academic Press Inc.; 2014: 367-374.
4. Raimondi C, Nicolazzo C, Gradilone A, Giannini G, De Falco E, Chimenti I, Varriale E, Hauch S, Plappert L, Cortesi E *et al*: **Circulating tumor cells: Exploring intratumor heterogeneity of colorectal cancer**. In., vol. 15, 5 edn. United States: Landes Bioscience; 2014: 496-503.
5. Magni E, Botteri E, Ravenda PS, Cassatella MC, Bertani E, Chiappa A, Luca F, Zorzino L, Bianchi PP, Adamoli L *et al*: **Detection of circulating tumor cells in patients with locally advanced rectal cancer undergoing neoadjuvant therapy followed by curative surgery**. In., vol. 29, 9 edn. Germany: Springer Verlag; 2014: 1053-1059.
6. Kalikaki A, Politaki H, Souglakos J, Apostolaki S, Papadimitraki E, Georgoulia N, Tzardi M, Mavroudis D, Georgoulas V, Voutsina A: **KRAS**

- genotypic changes of circulating tumor cells during treatment of patients with metastatic colorectal cancer.** In., vol. 9, 8 edn; 2014.
7. Allen JE, Saroya BS, Kunkel M, Dicker DT, Das A, Peters KL, Joudeh J, Zhu J, El-Deiry WS: **Apoptotic circulating tumor cells (CTCs) in the peripheral blood of metastatic colorectal cancer patients are associated with liver metastasis but not CTCs.** In., vol. 5, 7 edn. United States: Impact Journals LLC; 2014: 1753-1760.
  8. Neki K, Kawahara H, Watanabe K, Toyama Y, Akiba T, Yanaga K: **Usefulness of circulating tumor cells after preliminary chemotherapy for prediction of response to further anticancer therapy in patients with initially unresectable metastatic colorectal cancer.** In., vol. 33, 4 edn. Greece: International Institute of Anticancer Research (1st km Kapandritiou - Kalamou Rd., P.O. Box 22, Kapandriti, Attica GR-19014, Greece); 2013: 1769-1772.
  9. Mostert B, Jiang Y, Sieuwerts AM, Wang H, Bolt-De Vries J, Biermann K, Kraan J, Lalmahomed Z, Van Galen A, De Weerd V *et al*: **KRAS and BRAF mutation status in circulating colorectal tumor cells and their correlation with primary and metastatic tumor tissue.** In., vol. 133, 1 edn. United States: Wiley-Liss Inc. (111 River Street, Hoboken NJ 07030-5774, United States); 2013: 130-141.
  10. Kaifi JT, Kunkel M, Zhu J, Dicker DT, Gusani N, Yang Z, Sarwani NE, Li G, Kimchi ET, Staveley-O'Carroll KF *et al*: **Circulating tumor cells are associated with diffuse spread in stage IV colorectal cancer patients.** *Cancer biology & therapy* 2013, **14**(12):1174-1181.
  11. Gasch C, Bauernhofer T, Pichler M, Langer-Freitag S, Reeh M, Seifert AM, Mauermann O, Izbicki JR, Pantel K, Riethdorf S: **Heterogeneity of epidermal growth factor receptor status and mutations of KRAS/PIK3CA in circulating tumor cells of patients with colorectal cancer.** In., vol. 59, 1 edn. United States: American Association for Clinical Chemistry Inc. (2101 L Street NW, Suite 202, Washington DC 20037-1526, United States); 2013: 252-260.
  12. Ligthart ST, Coumans FAW, Bidard FC, Simkens LHJ, Punt CJA, de Groot MR, Attard G, de Bono JS, Pierga JY, Terstappen LWMM: **Circulating Tumor Cells Count and Morphological Features in Breast, Colorectal and Prostate Cancer.** In., vol. 8, 6 edn. United States: Public Library of Science (185 Berry Street, Suite 1300, San Francisco CA 94107, United States); 2013.
  13. Rahbari NN, Bork U, Kircher A, Nimitz T, Scholch S, Kahlert C, Schmidt T, Steinert G, Ulrich AB, Reissfelder C *et al*: **Compartmental differences of circulating tumor cells in colorectal cancer.** In., vol. 19, 7 edn. United States: Springer New York (233 Spring Street, New York NY 10013-1578, United States); 2012: 2195-2202.
  14. Leis O, Lopez-Mato P, Martin AG: **Circulating tumor stem cells as biomarkers for cancer progression.** In., vol. 2, 1 edn. Netherlands: Bentham Science Publishers B.V. (P.O. Box 294, Bussum 1400 AG, Netherlands); 2012: 36-53.

15. Gervasoni A, Sandri MT, Nascimbeni R, Zorzino L, Cassatella MC, Baglioni L, Panigara S, Gervasi M, Di Lorenzo D, Parolini O: **Comparison of three distinct methods for the detection of circulating tumor cells in colorectal cancer patients.** In., vol. 25, 6 edn. Greece: Spandidos Publications Ltd. (10 Vriaxidos Street, Athens 11635, Greece); 2011: 1669-1676.
16. Matsusaka S, Suenaga M, Mishima Y, Takagi K, Terui Y, Mizunuma N, Hatake K: **Circulating endothelial cells predict for response to bevacizumab-based chemotherapy in metastatic colorectal cancer.** *Cancer chemotherapy and pharmacology* 2011, **68**(3):763-768.
17. Thorsteinsson M, Soletormos G, Jess P: **Low number of detectable circulating tumor cells in non-metastatic colon cancer.** In., vol. 31, 2 edn. Greece: International Institute of Anticancer Research (1st km Kapandritiou - Kalamou Rd., P.O. Box 22, Kapandriti, Attiki GR-19014, Greece); 2011: 613-617.
18. Joosse S, Alix-Panabieres C, Deneve E, Beneken C, Nieuwland M, Kerkhoven R, Ramos J, Wikman H, Riethdorf L, Riethdorf S *et al*: **Genomic profiling of colorectal cancers from patients diagnosed with circulating tumor cells.** In., vol. 70, 8 SUPPL. 1 edn: American Association for Cancer Research Inc.; 2010.
19. Yalcin S, Kilickap S, Portakal O, Arslan C, Hascelik G, Kutluk T: **Determination of circulating tumor cells for detection of colorectal cancer progression or recurrence.** In., vol. 57, 104 edn. Greece: H.G.E. Update Medical Publishing Ltd. (P.O. Box 17257, Athens GR-10024, Greece); 2010: 1395-1398.
20. Wind J, Tuynman JB, Tibbe AG, Swennenhuis JF, Richel DJ, van Berge Henegouwen MI, Bemelman WA: **Circulating tumour cells during laparoscopic and open surgery for primary colonic cancer in portal and peripheral blood.** *European journal of surgical oncology : the journal of the European Society of Surgical Oncology and the British Association of Surgical Oncology* 2009, **35**(9):942-950.
21. Sastre J, Maestro ML, Puente J, Veganzones S, Alfonso R, Rafael S, Garcia-Saenz JA, Vidaurreta M, Martin M, Arroyo M *et al*: **Circulating tumor cells in colorectal cancer: Correlation with clinical and pathological variables.** In., vol. 19, 5 edn. United Kingdom: Oxford University Press; 2008: 935-938.
22. Balic M, Dandachi N, Hofmann G, Samonigg H, Loibner H, Obwaller A, van der Kooi A, Tibbe AGJ, Doyle GV, Terstappen L *et al*: **Comparison of two methods for enumerating circulating tumor cells in carcinoma patients.** *Cytometry Part B-Clinical Cytometry* 2005, **68B**(1):25-30.
23. Nikipelova EA, Kit OI, Novikova IA, Maksimov AY, Bakhtin AV, Nistratova OV, Ulianova EP, Anapalian V: **Probability of detection of circulating tumor cells in colorectal cancer stage III-IV.** In., vol. 32, 15 SUPPL. 1 edn: American Society of Clinical Oncology; 2014.
24. Zampino MG, Magni E, Ravenda SP, Botteri E, Bertani E, Chiappa A, Valvo

- M, Zorzino L, Adamoli L, Nole F *et al*: **Detection of circulating tumor cells (CTCs) in stage T3-4 and/or N positive rectal cancer (RC) patients undergoing neoadjuvant therapy followed by curative surgery.** In., vol. 31, 15 SUPPL. 1 edn: American Society of Clinical Oncology; 2013.
25. Teijeira L, Viudez A, Antelo ML, Zalba S, Hernandez I, Herrera J, Tarifa A, Zazpe C, Vera R: **Circulating tumor cells (CTCs) as a surrogate biomarker of DFS in patients (pts) with liver-only (L) metastases of colorectal cancer (LM-CRC).** In., vol. 49: Elsevier Ltd; 2013: S497.
26. Das A, Dicker DT, Harouaka R, Zheng S, Warfel N, Staveley-O'Carroll KF, El-Deiry WS, Kaifi JT: **Perioperative detection of circulating tumor cells in patients undergoing colorectal cancer liver and lung metastasectomy : Comparing CellSearch and FMSA technologies and investigating the role of EMT.** In., vol. 73, 8 SUPPL. 1 edn: American Association for Cancer Research Inc.; 2013.
27. Vay C, Sproll C, Will D, Baldus SE, Rehders A, Schulte Am Esch J, Topp SA, Knoefel WT, Stoecklein NH: **EpCAM as a surrogate marker for systemic adjuvant therapy-EpCAM-positive disseminated tumor cells represent an infrequent subpopulation in cancers of the digestive tract.** In., vol. 397, 4 edn: Springer Verlag; 2012: 654-655.
28. Scholten L, Terstappen LWMM, Van Der Palen J, Mastboom W, Tibbe A, Vermes I, De Groot M: **Circulating tumor cells as a possible prognostic tool in newly diagnosed nonmetastatic colorectal cancer?** In., vol. 30, 4 SUPPL. 1 edn: American Society of Clinical Oncology; 2012.
29. Mostert B, Sieuwerts AM, Van Galen AM, Bolt-de Vries J, Kraan J, Lalmahomed Z, Verhoef C, Jzermans JNMI, De Weerd V, Van Der Spoel P *et al*: **Generation of mRNA and miRNA gene expression profiles in circulating tumor cells of metastatic colorectal cancer patients.** In., vol. 72, 8 SUPPL. 1 edn: American Association for Cancer Research Inc.; 2012.
30. Das A, Joudeh J, Peters KL, Allen JE, Zheng S, Dicker DT, Yang Z, El-Deiry WS: **A population of metastatic colorectal cancer (mCRC) patients with radiologically proven liver metastasis and EpCAM expressing primary tumors show low circulating tumor cell counts by Veridex Cellsearch.** In., vol. 72, 8 SUPPL. 1 edn: American Association for Cancer Research Inc.; 2012.
31. Zogopoulos G, Selvarajah S, Ash C, Schwenter F, Chan D, Gallinger S, Moulton C: **Circulating tumor cells in patients undergoing liver resection for colorectal cancer liver metastases.** In., vol. 13: John Wiley and Sons Inc; 2011: 76.
32. Teijeira L, Viudez A, Arrazubi V, Verdun J, Uriz MJ, Antelo ML, Tarifa A, Zazpe C, Vera R: **Evolution of circulating tumor cells (CTCs) during neoadjuvant treatment and radical surgery in patients (pts) with liver-only metastases of colorectal cancer (L-CRC).** In., vol. 29, 15 SUPPL. 1 edn: American Society of Clinical Oncology; 2011.
33. Chiappa A, Bertani E, Contino G, Uccelli F, Spampatti S, Zampino MG,

- Leonardi C, Andreoni B: **Is there a role of circulating tumor cells (CTCs) as an independent prognostic factor in locally advanced rectal cancer?** In., vol. 47: Elsevier Ltd; 2011: S35.
34. Bork U, Rahbari NN, Kircher A, Niemetz T, Scholch S, Kahlert C, Steinert G, Buchler MW, Koch M, Weitz J: **Compartmental differences of circulating tumor cells in colorectal cancer.** In., vol. 396, 6 edn: Springer Verlag; 2011: 898.
35. Schwenter F, Ash C, Selvarajah S, Wegrynowski P, Zogopoulos G, O'Brien C, Moulton CA, Gallinger S: **Isolation of circulating tumor cells from hepatic vein blood of patients undergoing liver surgery for colorectal cancer metastases.** In., vol. 12: John Wiley and Sons Inc; 2010: 14.
36. Sato N, Hayashi N, Imamura Y, Kinoshita K, Kurashige J, Saito S, Karashima R, Hirashima K, Iwagami S, Miyamoto Y *et al*: **Usefulness of Transcription-Reverse Transcription Concerted (TRC) method in detecting circulating tumor cells of patients with colorectal cancer.** In., vol. 70, 8 SUPPL. 1 edn: American Association for Cancer Research Inc.; 2010.
37. Magni E, Botteri E, Cassatella MC, Bertani E, Barsalini C, Chiappa A, Bianchi P, Petrella M, Sandri M, Zampino MG: **Circulating tumor cells (CTCS) in locally advanced rectal cancer (LARC) patients undergoing neoadjuvant treatment.** In., vol. 21: Oxford University Press; 2010: viii223.
38. Chiappa A, Bertani E, Zampino M, Sandri M, Barsalini C, Andreoni B: **Detection of circulating tumor cells (CTCs) in locally advanced rectal cancer. Preliminary results.** In., vol. 36, 11 edn: W.B. Saunders Ltd; 2010: 1102.
39. Arrazubi V, Uriz M, Antelo M, Herrera J, Tarifa A, Zazpe C, Gomez M, Illarramendi J, Lainez N, Vera R: **Circulating tumor cells: Prognostic factor for metastatic colorectal cancer.** In., vol. 21: Oxford University Press; 2010: vi80.
40. Arrazubi V, M.J Ur, Antelo ML, Herrera J, Zazpe C, Tarifa A, Gomez ML, Salgado E, Hernandez B, Vera R: **Circulating tumor cells in colorectal cancer. A prospective study.** In., vol. 21: Oxford University Press; 2010: viii213.
41. Chiappa AC, Contino G, Bertani E, Bianchi PP, Zampino MG, Sandri MT, Magni E, Branchi V, Corbellini C, Andreoni B: **Detection of circulating tumour cells in locally advanced colorectal cancer: preliminary data.** *Ejc Supplements* 2009, **7**(2):146-146.
42. Alix-Panabieres C, Riethdorf S, Deneve E, Mercier G, Nocca D, Vendrell J-P, Pantel K: **Quantitative assessment of circulating tumor cells in the mesenteric and peripheral blood of patients with colorectal cancer.** *Proceedings of the American Association for Cancer Research Annual Meeting* 2009, **50**:1208-1209.
43. Koopman M, Tol J, Miller MC, Terstappen LW, Tissing H, Van Den Eertwegh AJ, Bos MM, Imholz AL, Punt C: **Circulating tumor cells (CTC) in advanced colorectal cancer (ACC) patients undergoing 1st line treatment**



- with chemotherapy, bevacizumab and cetuximab as an important and early predictor of survival.** In., vol. 19, S8 edn: Oxford University Press; 2008: viii166.
44. Kaifi JT, Kunkel M, Allen JE, Dicker DT, Das A, Gusani NJ, Reed MF, Kimchi ET, Staveley-O'Carroll KF, El-Deiry WS: **Presence of circulating tumor cells in patients with resectable colorectal cancer lung metastases is a potential indicator for extrathoracic disease.** *Journal of Surgical Research* 2013, **179**(2).
  45. 3Bao H, Burke PA, Huang J, Chen X, Brohawn PZ, Yao Y, Lechleider RJ, Sikorski RS, Buzoianu M, Zhang J *et al*: **Circulating Tumor Cells: Application as a Biomarker for Molecular Characterization and Predictor of Survival in an All-Comer Solid Tumor Phase I Clinical Study.** *PloS one* 2013, **8**(8).
  46. Zhou L, Yang Z, Baker M, Dicker DT, El-Deiry WS: **Multispectral imaging of mismatch repair proteins in colorectal cancers and tumor cells isolated from blood.** *Cancer research* 2012, **72**(8).
  47. Das A, Whitcomb TL, Allen JE, Dicker DT, Peters KL, El-Deiry WS: **Isolation and characterization of circulating tumor cells in a mouse model of colorectal cancer.** *Cancer research* 2012, **72**(8).
  48. Coumans FAW, Ligthart ST, Terstappen LWMM: **All patients with metastatic breast, colorectal and prostate carcinoma have circulating tumor cells.** *Cancer research* 2012, **72**(8).
  49. Soria J, De Braud FG, Cereda R, Bahleda R, Delmonte A, Angevin E, Varga A, Noberasco C, Dall'O E, Lassau N *et al*: **First-in-man study of E-3810, a novel VEGFR and FGFR inhibitor, in patients with advanced solid tumors.** *Journal of Clinical Oncology* 2011, **29**(15).
  50. Das A, Allen JE, Dicker DT, Peters KL, Joudeh J, El-Deiry WS: **Quantum dot multiplexing of prognostic marker and stem cell marker expression in colorectal cancer circulating tumor cells.** *Cancer research* 2011, **71**(8).
  51. Sua Villegas LF, Silva Perez NM, Vidaurreta Lazaro M, Maestro de las Casas ML, Rafael Fernandez S, Veganzones de Castro S: **Current and future techniques for quantifying circulating tumor cells: Importance in solid epithelial tumors.** *Revista del Laboratorio Clinico* 2011, **4**(3):163-169.

## ***(2): 5 duplicated studies***

1. Sastre J, Vidaurreta M, Gomez A, Rivera F, Massuti B, Lopez MR, Abad A, Gallen M, Benavides M, Aranda E *et al*: **Prognostic value of the combination of circulating tumor cells plus kras in patients with metastatic colorectal cancer treated with chemotherapy plus bevacizumab.** In., vol. 12, 4 edn. United States: Cancer Information Group, LP (3500 Maple Avenue, Suite 750, Dallas TX 75219, United States); 2013: 280-286.
2. Iwatsuki M, Toyoshima K, Watanabe M, Hayashi N, Ishimoto T, Eto K,

- Iwagami S, Baba Y, Yoshida N, Hayashi A *et al*: **Frequency of HER2 expression of circulating tumour cells in patients with metastatic or recurrent gastrointestinal cancer.** *British journal of cancer* 2013, **109**(11):2829-2832.
3. Cohen SJ, Punt CJ, Iannotti N, Saidman BH, Sabbath KD, Gabrail NY, Picus J, Morse MA, Mitchell E, Miller MC *et al*: **Prognostic significance of circulating tumor cells in patients with metastatic colorectal cancer.** *Annals of oncology : official journal of the European Society for Medical Oncology / ESMO* 2009, **20**(7):1223-1229.
  4. Cohen SJ, Punt CJ, Iannotti N, Saidman BH, Sabbath KD, Gabrail NY, Picus J, Morse M, Mitchell E, Miller MC *et al*: **Relationship of circulating tumor cells to tumor response, progression-free survival, and overall survival in patients with metastatic colorectal cancer.** *Journal of clinical oncology : official journal of the American Society of Clinical Oncology* 2008, **26**(19):3213-3221.
  5. Matsusaka S, Suenaga M, Mishima Y, Kuniyoshi R, Takagi K, Terui Y, Mizunuma N, Hatake K: **Circulating tumor cells as a surrogate marker for determining response to chemotherapy in Japanese patients with metastatic colorectal cancer.** *Cancer science* 2011, **102**(6):1188-1192.

### ***(3): 8 review or letter***

1. Gazzaniga P, Gianni W, Raimondi C, Gradilone A, Lo Russo G, Longo F, Gandini O, Tomao S, Frati L: **Circulating tumor cells in high-risk nonmetastatic colorectal cancer.** In., vol. 34, 5 edn. Netherlands: Springer Netherlands (Van Godewijkstraat 30, Dordrecht 3311 GZ, Netherlands); 2013: 2507-2509.
2. Vegas H, Andre T, Bidard FC, Ferrand FR, Huguet F, Mariani P, Pierga JY: **Disseminated and circulating tumor cells in gastrointestinal oncology.** In., vol. 99, 5 edn. France: John Libbey Eurotext (127, avenue de la Republique, Montrouge 92120, France); 2012: 535-544.
3. Balic M, Lin H, Williams A, Datar RH, Cote RJ: **Progress in circulating tumor cell capture and analysis: Implications for cancer management.** In., vol. 12, 3 edn. United Kingdom: Expert Reviews Ltd. (2 Albert Place, London N3 1QB, United Kingdom); 2012: 303-312.
4. Riethdorf S: **Clinical role of detecting circulating tumor cells.** In., vol. 81, SUPPL1 edn. Ireland: Elsevier Ireland Ltd (P.O. Box 85, Limerick, Ireland); 2012: S132.
5. Gazzaniga P, Gianni W, Gradilone A, Raimondi C, Cortesi E, Frati L: **Circulating tumor cells in young and elderly patients with colorectal cancer: "Lupus et agnus".** In., vol. 24, 6 edn. Italy: Springer International Publishing AG (Gewerbstrasse 11, Cham (ZG) 6330, Switzerland); 2012: 722-723.

6. Garcia-Paredes B, Maestro M, Vidaurreta M, Sastre J, Diaz-Rubio E: **Circulating tumor cells in colorectal cancer**. In., vol. 25, 3 edn. Spain: ARAN Ediciones S.A. (Castello 128 - 1o, Madrid 28006, Spain); 2011: 142-148.
7. Miller MC, Doyle GV, Terstappen LW: **Significance of Circulating Tumor Cells Detected by the CellSearch System in Patients with Metastatic Breast Colorectal and Prostate Cancer**. *Journal of oncology* 2010, **2010**:617421.
8. Davis JW: **Circulating tumor cell assays for the prognosis of prostate and colon cancers**. In., vol. 3, 3 edn. United Kingdom: Informa Healthcare (69-77 Paul Street, London EC2A 4LQ, United Kingdom); 2009: 293-301.

## 4. Included Studies

### *11 studies included in meta-analysis*

1. Sotelo MJ, Sastre J, Maestro ML, Veganzones S, Vieitez JM, Alonso V, Gravalos C, Escudero P, Vera R, Aranda E *et al*: **Role of circulating tumor cells as prognostic marker in resected stage III colorectal cancer**. *Annals of oncology : official journal of the European Society for Medical Oncology / ESMO* 2014.
2. Seeberg LT, Waage A, Brunborg C, Hugenschmidt H, Renolen A, Stav I, Bjornbeth BA, Brudvik KW, Borgen EF, Naume B *et al*: **Circulating Tumor Cells in Patients With Colorectal Liver Metastasis Predict Impaired Survival**. *Annals of surgery* 2014.
3. Gazzaniga P, Raimondi C, Gradilone A, Biondi Zoccai G, Nicolazzo C, Gandini O, Longo F, Tomao S, Lo Russo G, Seminara P *et al*: **Circulating tumor cells in metastatic colorectal cancer: do we need an alternative cutoff?** *Journal of cancer research and clinical oncology* 2013, **139**(8):1411-1416.
4. Aggarwal C, Meropol NJ, Punt CJ, Iannotti N, Saidman BH, Sabbath KD, Gabrail NY, Picus J, Morse MA, Mitchell E *et al*: **Relationship among circulating tumor cells, CEA and overall survival in patients with metastatic colorectal cancer**. *Annals of oncology : official journal of the European Society for Medical Oncology / ESMO* 2013, **24**(2):420-428.
5. Kuboki Y, Matsusaka S, Minowa S, Shibata H, Suenaga M, Shinozaki E, Mizunuma N, Ueno M, Yamaguchi T, Hatake K: **Circulating tumor cell (CTC) count and epithelial growth factor receptor expression on CTCs as biomarkers for cetuximab efficacy in advanced colorectal cancer**. *Anticancer research* 2013, **33**(9):3905-3910.

6. Deneve E, Riethdorf S, Ramos J, Nocca D, Coffy A, Daures JP, Maudelonde T, Fabre JM, Pantel K, Alix-Panabieres C: **Capture of viable circulating tumor cells in the liver of colorectal cancer patients.** *Clinical chemistry* 2013, **59**(9):1384-1392.
7. Sastre J, Maestro ML, Gomez-Espana A, Rivera F, Valladares M, Massuti B, Benavides M, Gallen M, Marcuello E, Abad A *et al*: **Circulating tumor cell count is a prognostic factor in metastatic colorectal cancer patients receiving first-line chemotherapy plus bevacizumab: a Spanish Cooperative Group for the Treatment of Digestive Tumors study.** *The oncologist* 2012, **17**(7):947-955.
8. Sato N, Hayashi N, Imamura Y, Tanaka Y, Kinoshita K, Kurashige J, Saito S, Karashima R, Hirashima K, Nagai Y *et al*: **Usefulness of transcription-reverse transcription concerted reaction method for detecting circulating tumor cells in patients with colorectal cancer.** *Annals of surgical oncology* 2012, **19**(6):2060-2065.
9. Papavasiliou P, Fisher T, Kuhn J, Nemunaitis J, Lamont J: **Circulating tumor cells in patients undergoing surgery for hepatic metastases from colorectal cancer.** *Proceedings* 2010, **23**(1):11-14.
10. Tol J, Koopman M, Miller MC, Tibbe A, Cats A, Creemers GJ, Vos AH, Nagtegaal ID, Terstappen LW, Punt CJ: **Circulating tumour cells early predict progression-free and overall survival in advanced colorectal cancer patients treated with chemotherapy and targeted agents.** *Annals of oncology : official journal of the European Society for Medical Oncology / ESMO* 2010, **21**(5):1006-1012.
11. Hiraiwa K, Takeuchi H, Hasegawa H, Saikawa Y, Suda K, Ando T, Kumagai K, Irino T, Yoshikawa T, Matsuda S *et al*: **Clinical significance of circulating tumor cells in blood from patients with gastrointestinal cancers.** *Annals of surgical oncology* 2008, **15**(11):3092-3100.
